# Supplementary material for: Depression drives perceived quality of life following minor stroke
Source: Springer Nature journal article supplement (doi:10.1186/s41687-025-00861-w), 2025-03-11
Supplement: MOESM1 [file 41687_2025_861_MOESM1_ESM.pdf]

**Do you agree with these statements about your recovery?**

**My stroke symptoms have recovered well.**

Strongly Disagree ---1---2---3---4---5---6---7--- Strongly Agree

**I am satisfied with my recovery/quality of life.**

Strongly Disagree ---1---2---3---4---5---6---7--- Strongly Agree

**The biggest factor currently impacting my quality of life is...**

---

---

---

---

---

---

We care about your inpatient experience. How was your hospitalization?

**How satisfied were you with your care?**

Strongly Dissatisfied ---1---2---3---4---5---6---7--- Strongly Satisfied

**Comments**

---

---

---

---

---
